# Supplementary material for: Provider Preferences, Perceptions, and Barriers to Colorectal Cancer Screening in Federally Qualified Health Centers: A Cross-Sectional Survey
Source: Research Square preprint supplement (doi:10.21203/rs.3.rs-9204324/v1), 2026-05-04
Supplement: Supplementary file 1 [file 0e0aae077786064ab966cc19.docx]

**Appendix: Provider Survey**

You have been invited to participate in this survey as part of the “*Stool-DNA Colorectal Cancer Screening Acceptability Among Racially Diverse Patients and their Primary Care Providers*” study. This survey asks about screening patients for colorectal cancer, and in particular, Cologuard, a stool-based DNA home screening test. Your responses will remain confidential. Your completion of the survey indicates your consent to participate. All responses will be reported in the aggregate. Upon completion of the survey in its entirety, you will have the option to claim a $25 gift card to thank you for your participation. Please follow the link on the page that loads when you submit your survey to claim your incentive. Completion of this survey should take less than 15 minutes. This survey has been approved by the UW Madison IRB. If you have questions about this study please contact Noelle LoConte, MD, Principal Investigator at ns3@medicine.wisc.edu

End of Block: Default Question Block

Start of Block: Block 1

This section asks about you and your practice.

| 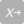 |
| --- |

**Q1** At which of the following community health centers do you currently practice?

- Clinic A (1)
- Clinic B (2)
- Clinic C (3)
- Clinic D (4)

***The precise location of these clinics were blinded for this manuscript***

| 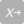 |
| --- |

**Q3** What type of provider are you?

- MD/DO (1)
- PA (2)
- NP (3)
- CNM (4)
- Other, please specify: (5) __________________________________________________

| 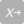 |
| --- |

**Q4** What is your primary area of practice?

- Internal Medicine (1)
- Ob/Gyn (2)
- Family Medicine (3)
- Geriatrics (4)
- Other, please specify: (5) __________________________________________________

**Q5** Approximately what percentage of your patients are 45-75 years old?

|  | 0 | 10 | 20 | 30 | 40 | 50 | 60 | 70 | 80 | 90 | 100 |
| --- | --- | --- | --- | --- | --- | --- | --- | --- | --- | --- | --- |

| % of patients (Q5) | 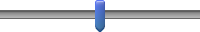 |
| --- | --- |

| 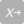 |
| --- |

**Q6** Exact Sciences is the maker of Cologuard.  Have you ever attended an Exact Sciences-sponsored event and/or met with an Exact Sciences representative?

- Yes (1)
- No (0)
- Unsure (2)

| 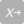 |
| --- |

**Q7** Have you participated in any other colorectal cancer screening professional development or continuing education activities since 2016?

- Yes (1)
- No (0)
- Unsure (2)

End of Block: Block 1

Start of Block: Block 2

This section asks about colorectal cancer screening recommendations you make for your average risk patients ages 50-75.

| 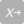 |
| --- |

**Q9** On a scale from 0 (not at all) to 5 (extremely), how effective do you believe screening is in reducing colorectal cancer mortality in average risk patients 50-75 years old?

- 0 Not at all effective (0)
- 1 (1)
- 2 (2)
- 3 (3)
- 4 (4)
- 5 Extremely effective (5)

Q10 To what percentage of your average risk patients age 50-75 do you recommend each of the following screening tests?

|  | 0 | 10 | 20 | 30 | 40 | 50 | 60 | 70 | 80 | 90 | 100 |
| --- | --- | --- | --- | --- | --- | --- | --- | --- | --- | --- | --- |

| FIT/iFOBT (**Q10_1**) | 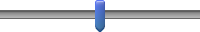 |
| --- | --- |
| Cologuard (**Q10_2**) | 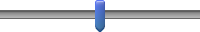 |
| Colonoscopy (**Q10_3**) | 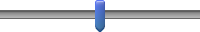 |

**Q11** When deciding which screening test to recommend to your average risk patients ages 50-75, how important are each of the following to your decision?

|  |
| --- |

Not at all important (1) Slightly (2) Moderately (3) Very (4) Extremely important (5)

| Patient preference (**Q11_1**) | 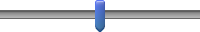 |
| --- | --- |
| Clinic capacity (**Q11_2**) | 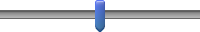 |
| Patient circumstances (**Q11_3**) | 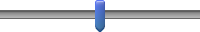 |
| Insurance reimbursement (**Q11_4**) | 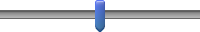 |
| Clinic policy/workflow (**Q11_5**) | 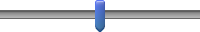 |
| Length of patient's appointment (**Q11_6**) | 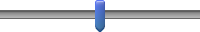 |
| Other, please specify: (**Q11_7**) | 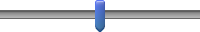 |

End of Block: Block 2

Start of Block: Block 3

The American Cancer Society and now the USPSTF recommend that colorectal cancer screening begin at age 45.  This section asks about colorectal cancer screening recommendations you make for your average risk patients ages 45-49.

| 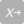 |
| --- |

**Q13** On a scale from 0 (not at all) to 5 (extremely), how effective do you believe screening is in reducing colorectal cancer mortality in average risk patients 45-49 years old?

- 0 Not at all effective (0)
- 1 (1)
- 2 (2)
- 3 (3)
- 4 (4)
- 5 Extremely effective (5)

Q14 To what percentage of your average risk patients ages 45-49 do you recommend each of the following tests?

|  | 0 | 10 | 20 | 30 | 40 | 50 | 60 | 70 | 80 | 90 | 100 |
| --- | --- | --- | --- | --- | --- | --- | --- | --- | --- | --- | --- |

| FIT/iFOBT (**Q14_1**) | 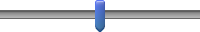 |
| --- | --- |
| Cologuard (**Q14_2**) | 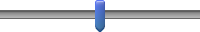 |
| Colonoscopy (**Q14_3**) | 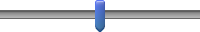 |

**Q15** When deciding which screening test to recommend to your average risk patients ages 45-49, how important are each of the following to your decision?

|  |  |  |  |  |  |
| --- | --- | --- | --- | --- | --- |

Not at all important (1) Slightly (2) Moderately (3) Very (4) Extremely important (5)

| Patient preference (**Q15_1**) | 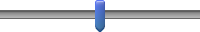 |
| --- | --- |
| Clinic capacity (**Q15_2**) | 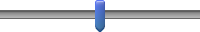 |
| Patient circumstances (**Q15_3**) | 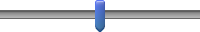 |
| Insurance reimbursement **(Q15_4**) | 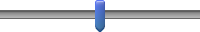 |
| Clinic policy/workflow (**Q15_5**) | 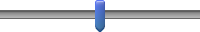 |
| Length of patient's appointment (**Q15_6**) | 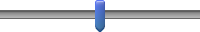 |
| Other, please specify: (**Q15_7**) | 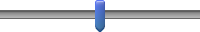 |

| 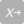 |
| --- |

**Q16** How has the COVID-19 pandemic impacted your prescription of Cologuard?

- I prescribe it more than I did pre-COVID (1)
- I prescribe it less than I did pre-COVID (2)
- I prescribe it the same as I did pre-COVID (3)
- Not applicable-- I did not make CRC screening recommendations to patients pre-COVID (4)

Q17 Thinking about the times you have prescribed Cologuard during the last 12 months, approximately what percentage of the time has each of the following occurred:

|  | NA/ Did not prescribe |
| --- | --- |

|  | 0 | 10 | 20 | 30 | 40 | 50 | 60 | 70 | 80 | 90 | 100 |
| --- | --- | --- | --- | --- | --- | --- | --- | --- | --- | --- | --- |

| The patient did not receive the test (**Q17_1**) | 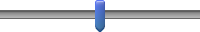 |
| --- | --- |
| The patient did not complete the test (**Q17_2**) | 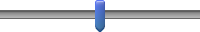 |
| The patient completed the test however it was unable to be processed (**Q17_3**) | 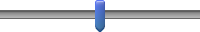 |
| I never received the test results (**Q17_4**) | 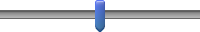 |

End of Block: Block 3

Start of Block: Block 4

This section asks your opinions about Cologuard/ Stool DNA screening for colorectal cancer.

| 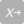 |
| --- |

**Q19** On a scale from 0 (not at all) to 5 (extremely), how effective do you believe Cologuard/ stool DNA is in detecting early stages of colorectal cancer?

- 0 Not at all (0)
- 1 (1)
- 2 (2)
- 3 (3)
- 4 (4)
- 5 Extremely (5)

| 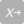 |
| --- |

**Q20** On a scale from 0 (not at all) to 5 (completely), how well do you feel you understand how Cologuard/ stool DNA tests screen for colorectal cancer?

- 0 Not at all (0)
- 1 (1)
- 2 (2)
- 3 (3)
- 4 (4)
- 5 Completely (5)

| 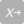 |
| --- |

**Q21** On a scale of 0 (not at all) to 5 (extremely), how concerned are you that Cologuard/ stool DNA tests collect DNA?

- 0 Not at all (0)
- 1 (1)
- 2 (2)
- 3 (3)
- 4 (4)
- 5 Extremely (5)

| 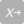 |
| --- |

**Q22** On a scale of 0 (not at all) to 5 (extremely), how concerned are you that Exact Sciences stores Cologuard test specimens/results for use in studies conducted by outside researchers?

- 0 Not at all (0)
- 1 (1)
- 2 (2)
- 3 (3)
- 4 (4)
- 5 Extremely (5)

End of Block: Block 4

Start of Block: Block 5

This section asks about challenges and barriers to prescribing Cologuard and to patients completing it.

| 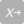 |
| --- |

Q24 Which of the following have you experienced as challenges/barriers to prescribing Cologuard? Please check all that apply. **1= yes, 0= no**

- Takes too much time out of an appointment to explain it (**Q24_1**)
- I am not able to answer all the questions patients have about it (**Q24_2**)
- Patients have other more acute/ important health issues (**Q24_3**)
- It cannot be ordered directly in our EHR (**Q24_4**)
- Paperwork/process to prescribe it is inconvenient/cumbersome (**Q24_5**)
- Our clinic does not have a workflow for Cologuard (**Q24_6**)
- Vendor prohibits keeping kits onsite for point-of-care distribution (**Q24_7**)
- Other, please specify: (**Q24_8**) __________________________________________________
- I have not experienced any challenges/ barriers to prescribing it (**Q24_9**)

| 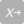 |
| --- |

Q25 Which of the following have you seen as challenges/barriers to your patients completing a Cologuard test you’ve prescribed? Please check all that apply. **1= yes, 0= no**

- It is complicated/too many steps and instructions (**Q25_1**)
- It is inconvenient (**Q25_2**)
- It requires follow-up tests/procedures (**Q25_3**)
- It is too expensive and/ or insurance doesn’t cover it (**Q25_4**)
- Not enough patient support from Exact Sciences (**Q25_5**)
- Patients don’t understand how the test works (**Q25_6**)
- Patients are afraid to find out if they have colorectal cancer (**Q25_7**)
- Patients aren’t worried about colorectal cancer (**Q25_8**)
- Patients are concerned about DNA collection (**Q25_9**)
- Patients are concerned about the storage of specimens for research (**Q25_10**)
- Other, please specify: (**Q25_11**) __________________________________________________
- I haven’t seen any challenges/barriers to patients completing it (**Q25_12**)

| 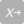 |
| --- |

Q26 What would need to happen for you to prescribe Cologuard/ stool DNA or to prescribe it more often? Please check all that apply. **1= yes, 0= no**

- More information about how the test works and its clinical effectiveness (**Q26_1**)
- More information about how the collected DNA is used/ banked (**Q26_2**)
- Lower cost for the test (**Q26_3**)
- Ability to prescribe it directly from our EHR (**Q26_4**)
- A clinic policy/ workflow specific to Cologuard/ stool DNA (**Q26_5**)
- Reminders and support for patients to complete it (**Q26_6**)
- Ability to distribute stool-DNA test kit at point-of-care (**Q26_7**)
- Other, please specify: (**Q26_8**) __________________________________________________

End of Block: Block 5

Start of Block: Block 6

This section asks about you and your personal experiences with colorectal cancer screening.

| 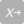 |
| --- |

**Q28** What is your gender?

- Male (1)
- Female (2)
- Prefer not to disclose (3)
- Other: (4) __________________________________________________

| 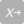 |
| --- |

**Q29** Are you 45 years of age or older?

- Yes (1)
- No (0)
- Prefer not to disclose (2)

| 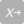 |
| --- |

**Q30** Have you ever personally been screened for colorectal cancer? Please check all that apply.

- Yes, with Cologuard (1)
- Yes, with Colonoscopy (2)
- Yes, with another procedure/ test (3)
- No, I have never been screened (4)
- I prefer not to disclose (5)

| 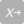 |
| --- |

**Q31** Has a first-degree family member of yours ever screened using Cologuard/stool DNA?

- Yes (1)
- No (0)
- Unsure (2)
- I prefer not to disclose (3)
